# Supplementary figures and images for: Novel repertoire of tau biosensors to monitor pathological tau transformation and seeding activity in living cells
Source: eLife journal article supplement (doi:10.7554/elife.78360), 2023-02-27

**Raw unedited gel of Figure 1E**

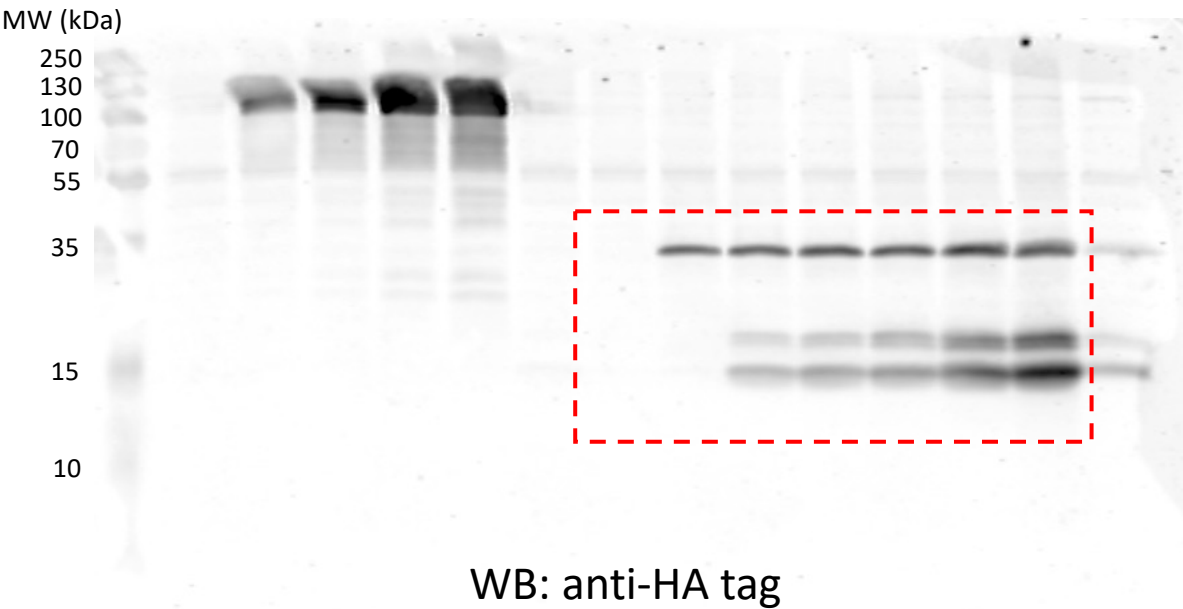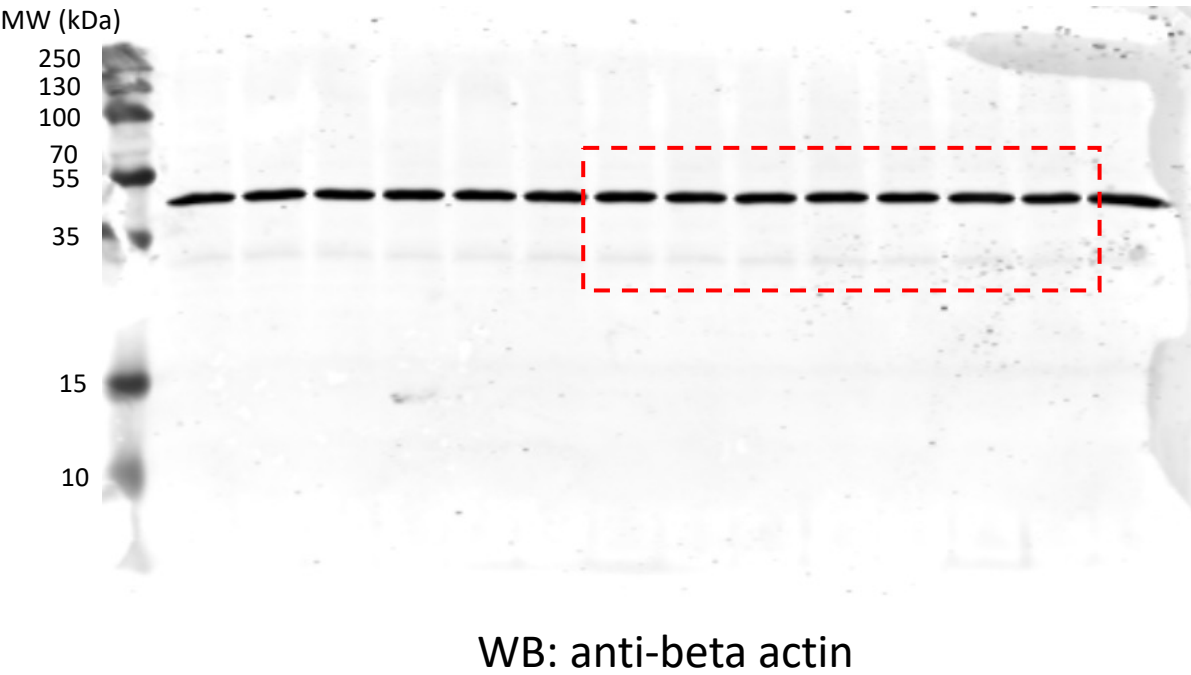

Supplement: fig1-data1 [file elife-78360-fig1-data1-v1.zip]

**Raw unedited gel of Figure 2E**

MW (kDa)

250  
130  
100  
70  
55  
35  
15  
10

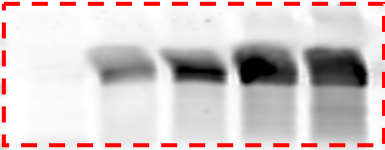

WB: anti-HA tag

MW (kDa)

250  
130  
100  
70  
55  
35  
15  
10

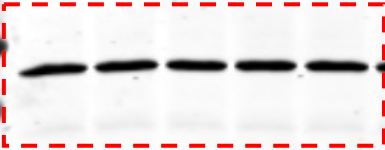

WB: anti-beta actin

Supplement: fig2-data2 [file Fig2E-source_data.pdf › Fig2-Source_data_2/Fig2E-source_data.pdf]

## Raw unedited gel of Figure 2K

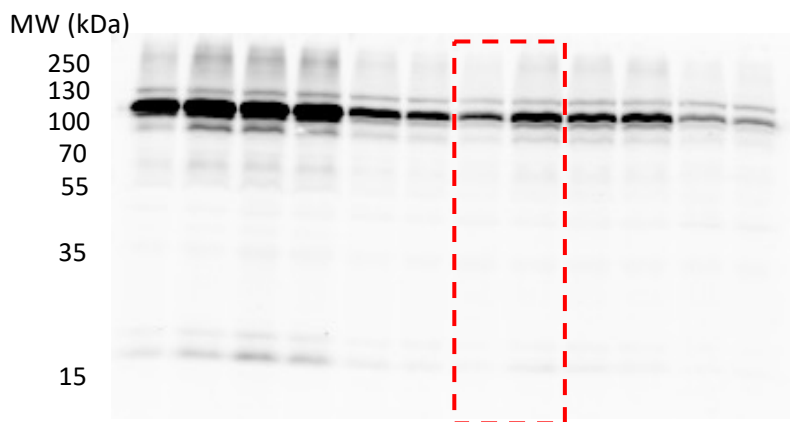

WB: anti-phospho-tau (AT8 antibody)

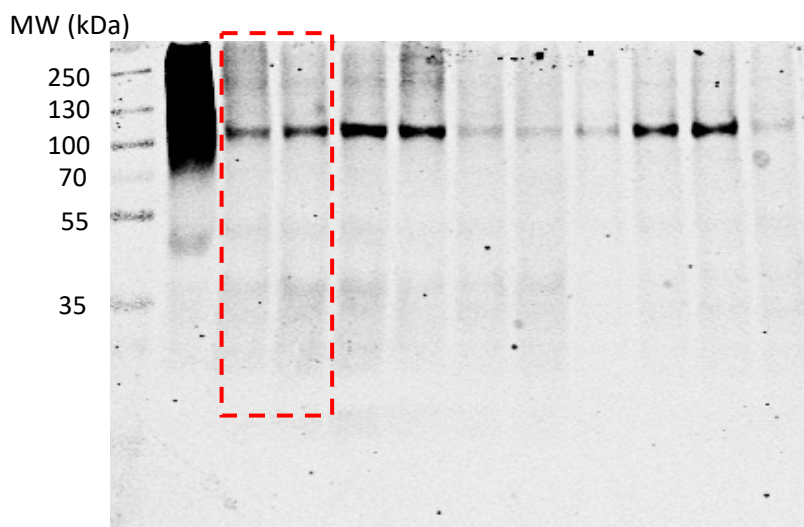

WB: anti-HA tag

Supplement: fig2-data3 [file elife-78360-fig2-data3-v1.zip]

## Raw unedited gel of Figure 2L

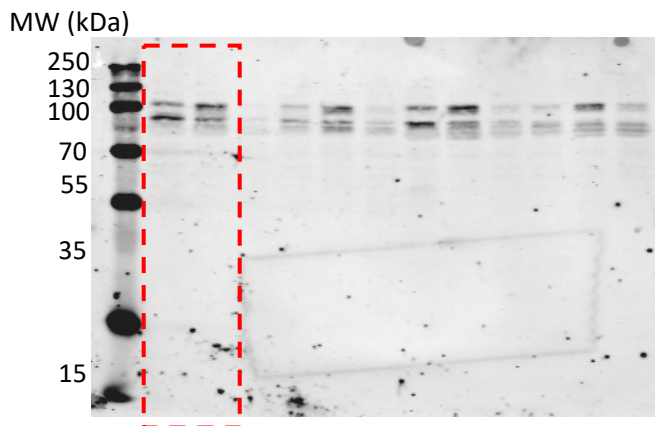

WB: anti-phospho-tau (AT8 antibody)

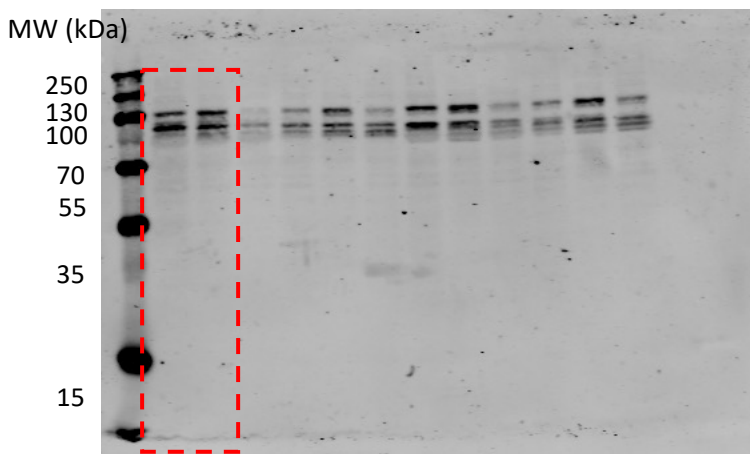

WB: anti-HA tag

Supplement: fig2-data4 [file elife-78360-fig2-data4-v1.zip]

Raw unedited gel of Figure 2M

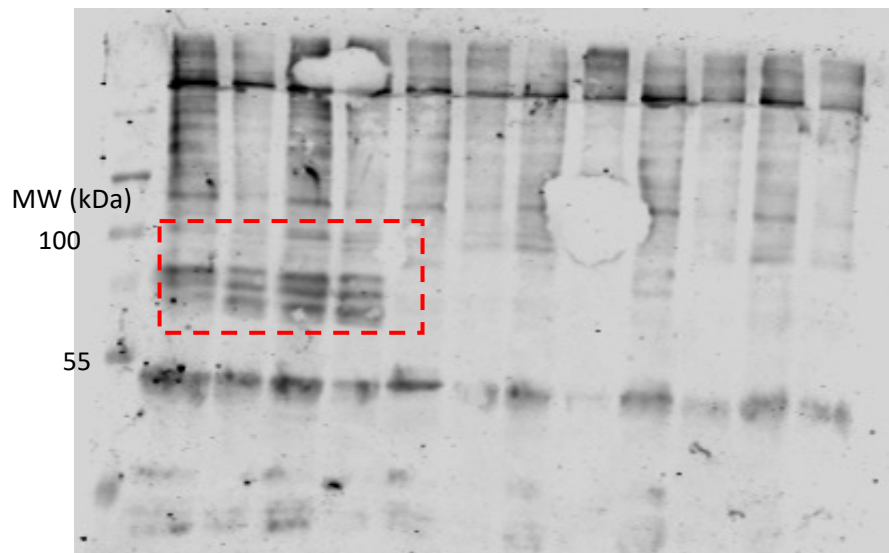

WB: anti-phospho-tau (AT8 antibody)

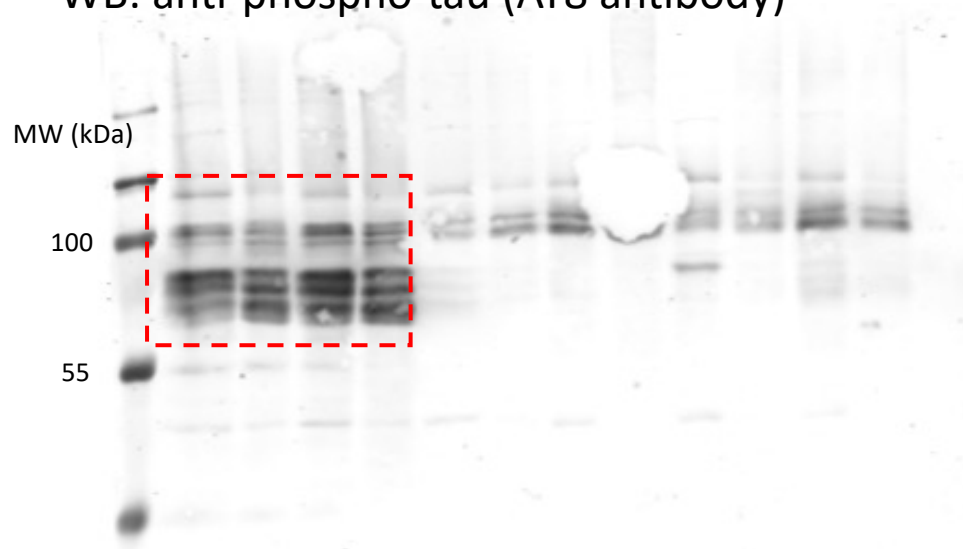

WB: anti-HA tag

Supplement: fig2-data5 [file elife-78360-fig2-data5-v1.zip]

Raw unedited gel of Figure 4A

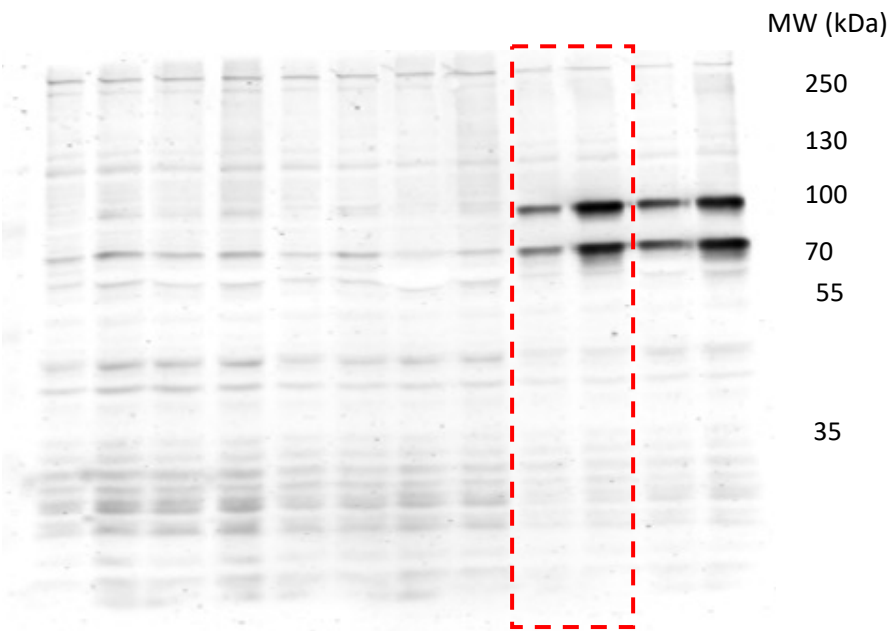

WB: anti-phospho-tau (AT8 antibody)

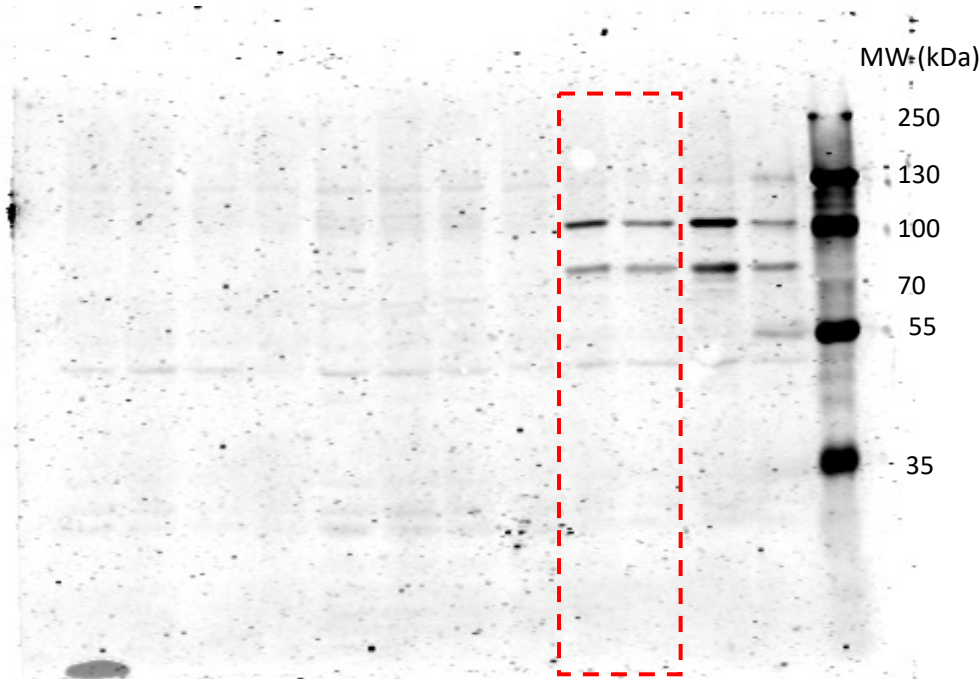

WB: anti-HA tag

Supplement: fig4-data1 [file elife-78360-fig4-data1-v1.zip]

Raw unedited gel of Figure 4B

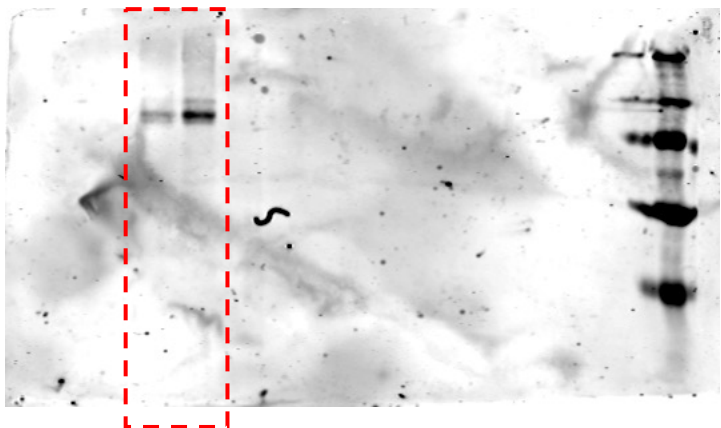

WB: anti-phospho-tau (AT8 antibody)

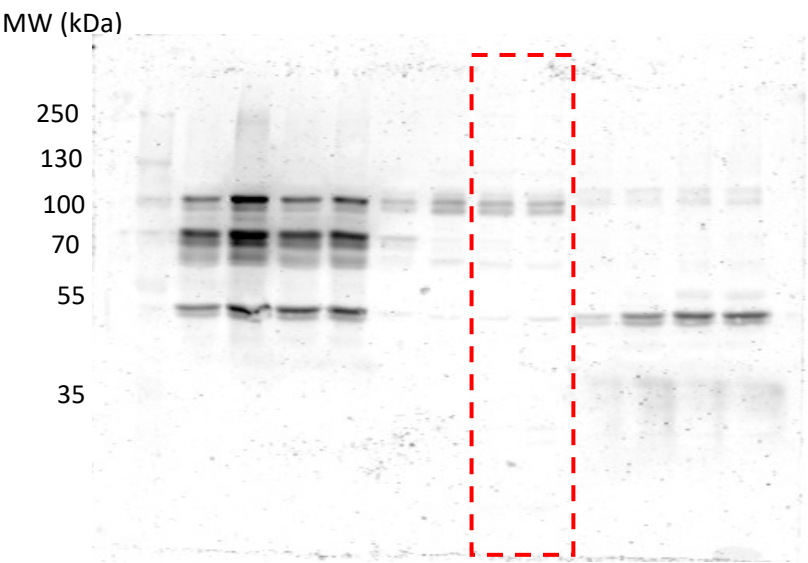

WB: anti-HA tag

Supplement: fig4-data2 [file elife-78360-fig4-data2-v1.zip]
